# Supplementary material for: Profile and Outcomes of Hospitalized COVID-19 Patients during the Prevalence of the Omicron Variant According to the Brazilian Regions: A Retrospective Cohort Study from 2022
Source: MDPI journal article supplement (doi:10.3390/vaccines11101568), 2023-10-05
Supplement: s1 [file s1]

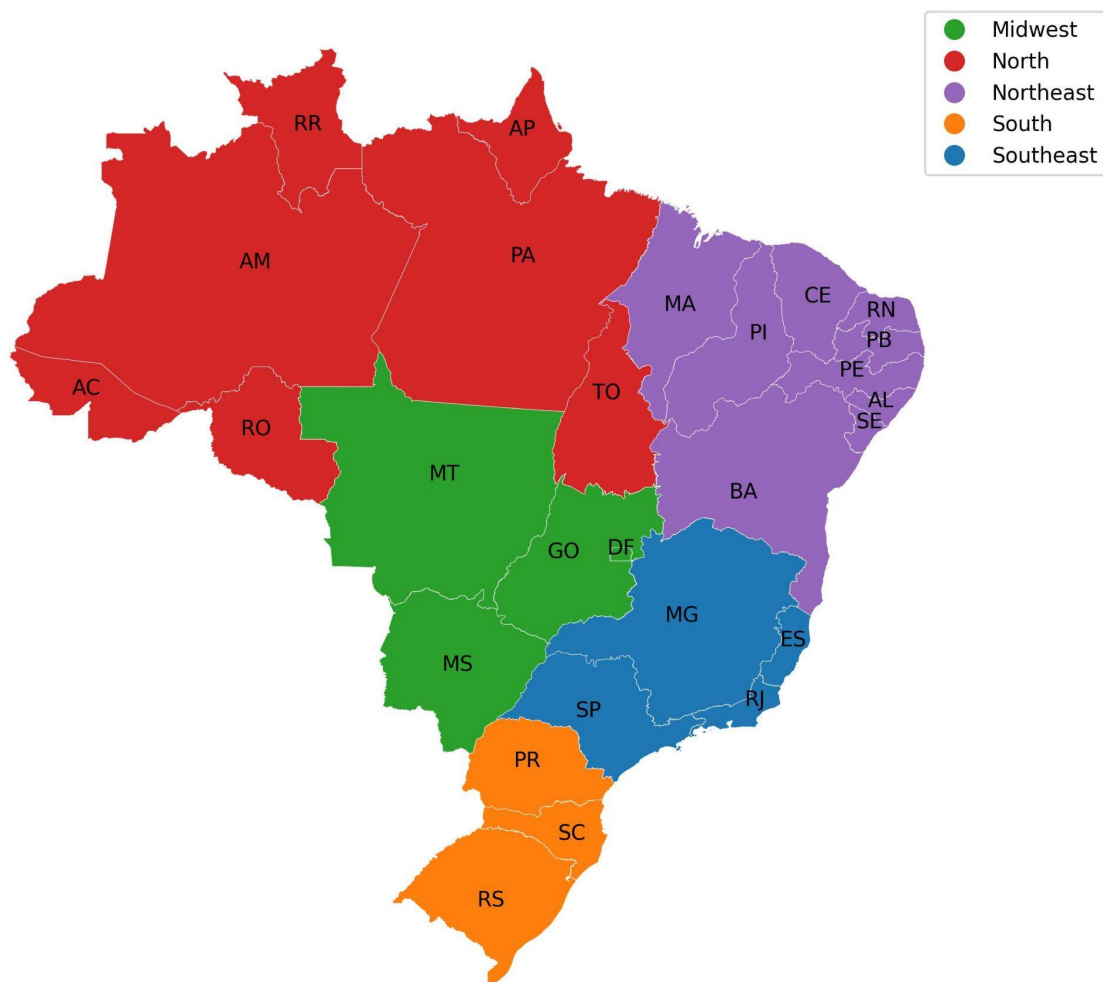

**Supplementary Figure S1.** Brazilian Regions. Brazil is divided into five major regions by the Brazilian Institute of Geography and Statistics (IBGE). The federative units are grouped according to geographic, social and economic factors. Generated with `Python` (3.10.6), `pandas` (1.5.3), `matplotlib` (3.7.1), and `geobr` (0.2.0).

**Supplementary Table S1.** Number of vaccine doses in hospitalized patients during the prevalence of the Omicron variant and its subvariants (01/01/2022 - 31/12/2022). Percentage values by region and age group. Adjusted odds ratio (aOR) estimates the chance of having 0 doses, 1 dose, 2 doses, or 3 doses comparing regions (reference=Southeast). Models were adjusted for gender and comorbidities.

| age group | region    | 0 doses (%) | aOR (95% CI), p-value     | 1 dose (%) | aOR (95% CI), p-value     | 2 doses (%) | aOR (95% CI), p-value     | 3 doses (%) | aOR (95% CI), p-value     |
|-----------|-----------|-------------|---------------------------|------------|---------------------------|-------------|---------------------------|-------------|---------------------------|
| 18-39     | Midwest   | 30.64       | 1.46 (1.28-1.67), p<0.001 | 13.43      | 1.47 (1.23-1.76), p<0.001 | 40.65       | 0.86 (0.77-0.98), p=0.018 | 15.28       | 0.60 (0.51-0.71), p<0.001 |
|           | North     | 40.07       | 2.17 (1.80-2.61), p<0.001 | 15.21      | 1.62 (1.26-2.09), p<0.001 | 36.36       | 0.74 (0.62-0.89), p<0.005 | 8.35        | 0.31 (0.22-0.42), p<0.001 |
|           | Northeast | 37.05       | 1.93 (1.69-2.20), p<0.001 | 10.90      | 1.13 (0.92-1.38), p=0.241 | 35.25       | 0.70 (0.62-0.80), p<0.001 | 16.80       | 0.67 (0.57-0.79), p<0.001 |
|           | South     | 23.05       | 1.00 (0.90-1.11), p=0.987 | 11.78      | 1.27 (1.10-1.47), p<0.005 | 49.34       | 1.23 (1.12-1.35), p<0.001 | 15.83       | 0.62 (0.55-0.70), p<0.001 |
|           | Southeast | 23.22       | 1                         | 9.61       | 1                         | 44.04       | 1                         | 23.13       | 1                         |
| 40-59     | Midwest   | 28.49       | 1.26 (1.14-1.41), p<0.001 | 7.06       | 1.11 (0.92-1.34), p=0.280 | 42.11       | 1.02 (0.92-1.12), p=0.710 | 22.33       | 0.74 (0.66-0.83), p<0.001 |
|           | North     | 39.00       | 2.07 (1.76-2.43), p<0.001 | 7.86       | 1.26 (0.94-1.67), p=0.119 | 42.14       | 1.01 (0.87-1.18), p=0.861 | 11.00       | 0.31 (0.25-0.40), p<0.001 |
|           | Northeast | 32.75       | 1.57 (1.42-1.75), p<0.001 | 7.42       | 1.18 (0.98-1.42), p=0.078 | 37.60       | 0.83 (0.76-0.92), p<0.001 | 22.22       | 0.73 (0.66-0.82), p<0.001 |
|           | South     | 23.16       | 0.97 (0.89-1.05), p=0.417 | 6.70       | 1.05 (0.91-1.21), p=0.495 | 47.38       | 1.25 (1.16-1.34), p<0.001 | 22.77       | 0.76 (0.70-0.82), p<0.001 |
|           | Southeast | 23.71       | 1                         | 6.39       | 1                         | 41.89       | 1                         | 28.01       | 1                         |

|       |           |       |                              |      |                              |       |                              |       |                              |
|-------|-----------|-------|------------------------------|------|------------------------------|-------|------------------------------|-------|------------------------------|
| 60-79 | Midwest   | 21.50 | 1.16 (1.07-1.26),<br>p<0.001 | 2.72 | 0.94 (0.77-1.16),<br>p=0.573 | 39.99 | 1.26 (1.17-1.35),<br>p<0.001 | 35.79 | 0.73 (0.68-0.78),<br>p<0.001 |
|       | North     | 32.73 | 2.04 (1.80-2.31),<br>p<0.001 | 5.61 | 2.01 (1.55-2.59),<br>p<0.001 | 40.56 | 1.29 (1.15-1.45),<br>p<0.001 | 21.10 | 0.35 (0.31-0.40),<br>p<0.001 |
|       | Northeast | 25.43 | 1.48 (1.38-1.60),<br>p<0.001 | 4.42 | 1.58 (1.35-1.86),<br>p<0.001 | 36.69 | 1.09 (1.02-1.16),<br>p=0.012 | 33.46 | 0.65 (0.61-0.69),<br>p<0.001 |
|       | South     | 15.82 | 0.83 (0.78-0.88),<br>p<0.001 | 2.42 | 0.84 (0.73-0.97),<br>p=0.017 | 37.79 | 1.14 (1.09-1.19),<br>p<0.001 | 43.98 | 1.00 (0.96-1.05),<br>p=0.923 |
|       | Southeast | 18.67 | 1                            | 2.86 | 1                            | 34.71 | 1                            | 43.76 | 1                            |
| >=80  | Midwest   | 20.25 | 1.20 (1.09-1.33),<br>p<0.001 | 2.30 | 0.94 (0.72-1.21),<br>p=0.610 | 39.08 | 1.34 (1.24-1.45),<br>p<0.001 | 38.37 | 0.68 (0.63-0.74),<br>p<0.001 |
|       | North     | 29.40 | 1.95 (1.66-2.28),<br>p<0.001 | 6.42 | 2.76 (2.05-3.73),<br>p<0.001 | 42.62 | 1.56 (1.35-1.80),<br>p<0.001 | 21.57 | 0.30 (0.25-0.36),<br>p<0.001 |
|       | Northeast | 23.41 | 1.49 (1.37-1.61),<br>p<0.001 | 4.09 | 1.73 (1.45-2.06),<br>p<0.001 | 36.37 | 1.19 (1.11-1.28),<br>p<0.001 | 36.13 | 0.61 (0.57-0.65),<br>p<0.001 |
|       | South     | 14.40 | 0.84 (0.78-0.90),<br>p<0.001 | 1.97 | 0.80 (0.67-0.96),<br>p=0.016 | 33.67 | 1.05 (1.00-1.11),<br>p=0.056 | 49.96 | 1.07 (1.02-1.12),<br>p=0.011 |
|       | Southeast | 16.95 | 1                            | 2.43 | 1                            | 32.49 | 1                            | 48.13 | 1                            |

**Supplementary Table S2.** Percentage of the population vaccinated with 1, 2 or 3 doses in the different Brazilian states and regions until the beginning of March/2023.

|                     | 1 dose (%)        | 2 doses (%)       | 3 doses (booster) (%) |
|---------------------|-------------------|-------------------|-----------------------|
| <b>Brazil</b>       | <b>83.15±6.55</b> | <b>78.00±8.73</b> | <b>54.62±14.72</b>    |
| <b>North</b>        |                   |                   |                       |
| Acre                | 77.36             | 69.54             | 49.48                 |
| Amapá               | 72.91             | 64.51             | 48.32                 |
| Amazonas            | 80.03             | 71.10             | 57.89                 |
| Pará                | 78.27             | 75.65             | 28.40                 |
| Rondônia            | 73.25             | 67.54             | 38.57                 |
| Roraima             | 72.85             | 59.01             | 27.26                 |
| Tocantins           | 73.74             | 67.67             | 37.24                 |
| <b>Mean±SD</b>      | <b>75.49±2.99</b> | <b>67.86±5.22</b> | <b>41.02±11.39</b>    |
| <b>Northeast</b>    |                   |                   |                       |
| Alagoas             | 77.78             | 69.21             | 43.20                 |
| Bahia               | 77.95             | 72.42             | 53.64                 |
| Ceará               | 93.85             | 87.94             | 60.82                 |
| Maranhão            | 80.33             | 67.19             | 33.08                 |
| Paraíba             | 87.51             | 83.75             | 57.09                 |
| Pernambuco          | 88.96             | 83.84             | 57.16                 |
| Piauí               | 96.17             | 88.00             | 75.34                 |
| Rio Grande do Norte | 83.72             | 79.79             | 57.01                 |
| Sergipe             | 86.51             | 81.42             | 58.84                 |
| <b>Mean±SD</b>      | <b>85.86±6.57</b> | <b>79.28±7.84</b> | <b>55.13±11.71</b>    |
| <b>Southeast</b>    |                   |                   |                       |
| Espírito Santo      | 85.29             | 79.94             | 54.96                 |
| Minas Gerais        | 86.56             | 86.40             | 86.42                 |
| Rio de Janeiro      | 84.35             | 81.48             | 70.33                 |

|                    |                   |                   |                    |
|--------------------|-------------------|-------------------|--------------------|
| São Paulo          | 93.04             | 90.39             | 62.45              |
| <b>Mean±SD</b>     | <b>87.31±3.93</b> | <b>84.55±4.77</b> | <b>68.54±13.47</b> |
| <b>South</b>       |                   |                   |                    |
| Paraná             | 88.9              | 89.10             | 73.03              |
| Rio Grande do Sul  | 86.19             | 85.21             | 73.76              |
| Santa Catarina     | 86.0              | 83.72             | 56.94              |
| <b>Mean±SD</b>     | <b>87.03±1.62</b> | <b>86.01±2.78</b> | <b>67.91±9.51</b>  |
| <b>Midwest</b>     |                   |                   |                    |
| Distrito Federal   | 90.55             | 89.72             | 60.10              |
| Goiás              | 82.98             | 78.02             | 65.20              |
| Mato Grosso        | 80.42             | 75.10             | 43.12              |
| Mato Grosso do Sul | 79.68             | 78.29             | 48.04              |
| <b>Mean±SD</b>     | <b>83.41±4.98</b> | <b>80.28±6.46</b> | <b>54.11±10.27</b> |

Data source: Cota, W. Monitoring the number of COVID-19 cases and deaths in Brazil at municipal and federative units level. Available from: <https://coronavirusbra1.github.io/> (accessed on September 5, 2023).

**Supplementary Table S3.** Outcomes of hospitalized patients during the prevalence of the Omicron variant and its subvariants (01/01/2022 -12/31/2022). Percentage values by region and age group. Adjusted relative risks (aRR) for unfavorable outcomes comparing regions (reference=Southeast). Models were adjusted for gender, doses, and comorbidities.

| age group | region    | ICU (%) | aRR (95% CI), p-value     | IMV (%) | aRR (95% CI), p-value     | Death (%) | aRR (95% CI), p-value     |
|-----------|-----------|---------|---------------------------|---------|---------------------------|-----------|---------------------------|
| 18-39     | Midwest   | 25.36   | 0.95 (0.86-1.05), p=0.312 | 11.38   | 1.32 (1.10-1.59), p<0.005 | 8.90      | 1.02 (0.85-1.22), p=0.856 |
|           | North     | 20.33   | 0.72 (0.60-0.86), p<0.001 | 13.33   | 1.29 (1.00-1.67), p=0.055 | 13.17     | 1.17 (0.92-1.49), p=0.188 |
|           | Northeast | 33.57   | 1.13 (1.03-1.24), p=0.011 | 18.04   | 1.78 (1.51-2.10), p<0.001 | 19.67     | 1.81 (1.56-2.11), p<0.001 |
|           | South     | 19.64   | 0.73 (0.67-0.80), p<0.001 | 9.42    | 1.11 (0.96-1.29), p=0.152 | 8.58      | 1.01 (0.88-1.17), p=0.880 |
|           | Southeast | 27.58   | 1                         | 8.61    | 1                         | 8.64      | 1                         |
| 40-59     | Midwest   | 35.82   | 0.99 (0.93-1.06), p=0.785 | 17.07   | 1.09 (0.97-1.22), p=0.135 | 18.43     | 0.85 (0.77-0.93), p<0.005 |
|           | North     | 30.30   | 0.83 (0.74-0.94), p<0.005 | 21.15   | 1.33 (1.13-1.56), p<0.005 | 25.43     | 1.12 (0.98-1.27), p=0.102 |
|           | Northeast | 41.20   | 1.11 (1.05-1.18), p<0.005 | 24.05   | 1.49 (1.35-1.63), p<0.001 | 29.11     | 1.28 (1.18-1.38), p<0.001 |
|           | South     | 30.64   | 0.82 (0.78-0.86), p<0.001 | 16.65   | 1.02 (0.94-1.11), p=0.592 | 20.48     | 0.91 (0.85-0.97), p=0.005 |
|           | Southeast | 36.95   | 1                         | 15.88   | 1                         | 21.97     | 1                         |
| 60-79     | Midwest   | 41.82   | 1.10 (1.05-1.14), p<0.001 | 19.97   | 1.10 (1.03-1.19), p=0.006 | 28.42     | 0.88 (0.84-0.93), p<0.001 |
|           | North     | 31.13   | 0.82 (0.75-0.89), p<0.001 | 24.60   | 1.35 (1.21-1.51), p<0.001 | 35.70     | 1.08 (1.00-1.17), p=0.041 |
|           | Northeast | 47.64   | 1.23 (1.19-1.28), p<0.001 | 26.68   | 1.46 (1.37-1.54), p<0.001 | 38.29     | 1.16 (1.12-1.21), p<0.001 |
|           | South     | 33.77   | 0.87 (0.84-0.90), p<0.001 | 19.74   | 1.08 (1.03-1.13), p<0.005 | 31.44     | 0.96 (0.93-0.99), p=0.018 |
|           | Southeast | 38.55   | 1                         | 18.09   | 1                         | 32.26     | 1                         |

|      |           |       |                           |       |                           |       |                           |
|------|-----------|-------|---------------------------|-------|---------------------------|-------|---------------------------|
| >=80 | Midwest   | 46.98 | 1.39 (1.33-1.45), p<0.001 | 19.20 | 1.44 (1.32-1.57), p<0.001 | 35.87 | 0.89 (0.84-0.93), p<0.001 |
|      | North     | 32.76 | 0.97 (0.87-1.07), p=0.518 | 22.48 | 1.66 (1.43-1.93), p<0.001 | 46.60 | 1.11 (1.03-1.20), p=0.006 |
|      | Northeast | 46.29 | 1.36 (1.30-1.41), p<0.001 | 20.11 | 1.52 (1.41-1.63), p<0.001 | 44.53 | 1.10 (1.06-1.14), p<0.001 |
|      | South     | 25.24 | 0.73 (0.70-0.76), p<0.001 | 12.94 | 0.98 (0.92-1.05), p=0.579 | 39.06 | 0.98 (0.95-1.01), p=0.251 |
|      | Southeast | 34.28 | 1                         | 13.10 | 1                         | 39.68 | 1                         |

**Supplementary Table S4.** In-hospital death (%) in patients during the prevalence of the Omicron variant and its subvariants (01/01/2022 - 12/31/2022). Percentage values by region, age group and number of vaccine doses. Adjusted relative risks (aRR) for death between 2 or 3 doses and 0 or 1 dose (reference). Models were adjusted for gender and comorbidities.

| region    | age group | 0 or 1 dose (%) | 2 or 3 doses (%) | aRR [95% CI]     | p-value |
|-----------|-----------|-----------------|------------------|------------------|---------|
| Southeast | 18-39     | 10.32           | 7.82             | 0.78 [0.64-0.97] | 0.022   |
|           | 40-59     | 24.87           | 20.71            | 0.80 [0.73-0.88] | <0.001  |
|           | 60-79     | 35.95           | 31.25            | 0.85 [0.81-0.89] | <0.001  |
|           | >=80      | 45.60           | 38.25            | 0.83 [0.79-0.87] | <0.001  |
| South     | 18-39     | 9.07            | 8.32             | 0.92 [0.68-1.24] | 0.581   |
|           | 40-59     | 22.43           | 19.64            | 0.80 [0.68-0.93] | <0.005  |
|           | 60-79     | 32.90           | 31.11            | 0.92 [0.84-1.01] | 0.084   |
|           | >=80      | 45.72           | 37.76            | 0.76 [0.70-0.82] | <0.001  |
| Midwest   | 18-39     | 11.11           | 7.16             | 0.76 [0.51-1.14] | 0.189   |
|           | 40-59     | 21.55           | 16.71            | 0.82 [0.65-1.03] | 0.084   |
|           | 60-79     | 32.55           | 27.10            | 0.81 [0.72-0.92] | <0.005  |
|           | >=80      | 44.68           | 33.30            | 0.80 [0.71-0.91] | <0.001  |
| North     | 18-39     | 16.11           | 9.54             | 0.42 [0.22-0.78] | 0.007   |
|           | 40-59     | 25.61           | 25.27            | 0.85 [0.62-1.17] | 0.329   |
|           | 60-79     | 39.78           | 33.16            | 0.86 [0.71-1.03] | 0.107   |
|           | >=80      | 49.82           | 44.80            | 0.92 [0.76-1.11] | 0.375   |
| Northeast | 18-39     | 20.17           | 19.21            | 0.81 [0.61-1.08] | 0.155   |
|           | 40-59     | 32.97           | 26.52            | 0.74 [0.63-0.88] | <0.001  |
|           | 60-79     | 42.82           | 36.36            | 0.87 [0.79-0.97] | 0.010   |
|           | >=80      | 51.36           | 41.94            | 0.79 [0.72-0.86] | <0.001  |



**Supplementary Table S5.** Comorbidities in hospitalized patients during the prevalence of the Omicron variant and its subvariants (01/01/2022 -12/31/2022). Percentage values by region and age group.

| region    | age group | asthma | cardio. disease | diabetes | immunosuppression | kidney disease | neuropathy | obesity | pneumopathy |
|-----------|-----------|--------|-----------------|----------|-------------------|----------------|------------|---------|-------------|
| Southeast | 18-39     | 4.52   | 8.19            | 7.97     | 7.51              | 3.73           | 5.75       | 5.27    | 2.01        |
|           | 40-59     | 4.19   | 33.57           | 23.88    | 10.85             | 9.02           | 6.82       | 9.62    | 5.29        |
|           | 60-79     | 3.68   | 53.43           | 39.28    | 8.30              | 10.18          | 10.65      | 8.40    | 12.17       |
|           | >=80      | 3.04   | 57.92           | 32.88    | 3.74              | 9.32           | 18.97      | 3.77    | 11.37       |
| South     | 18-39     | 4.05   | 8.15            | 6.85     | 6.85              | 3.37           | 6.29       | 6.48    | 2.33        |
|           | 40-59     | 4.51   | 31.59           | 23.05    | 10.28             | 8.29           | 8.66       | 11.52   | 7.55        |
|           | 60-79     | 4.41   | 54.28           | 38.33    | 8.52              | 9.29           | 13.28      | 10.68   | 15.71       |
|           | >=80      | 4.34   | 59.00           | 32.69    | 4.29              | 8.43           | 20.82      | 5.27    | 14.21       |
| Midwest   | 18-39     | 3.40   | 7.20            | 7.64     | 7.36              | 4.21           | 4.14       | 5.62    | 1.35        |
|           | 40-59     | 3.57   | 27.90           | 21.93    | 9.13              | 7.26           | 5.30       | 8.03    | 3.63        |
|           | 60-79     | 3.28   | 47.76           | 36.23    | 5.26              | 9.45           | 7.91       | 6.58    | 10.08       |
|           | >=80      | 2.96   | 49.60           | 28.67    | 3.06              | 6.88           | 13.86      | 3.31    | 10.02       |
| North     | 18-39     | 3.57   | 6.29            | 4.26     | 19.21             | 3.80           | 4.47       | 3.56    | 1.66        |
|           | 40-59     | 3.02   | 28.81           | 24.18    | 11.05             | 10.64          | 1.30       | 5.98    | 2.22        |
|           | 60-79     | 2.57   | 42.18           | 37.54    | 5.65              | 8.51           | 4.07       | 3.73    | 3.63        |
|           | >=80      | 1.66   | 45.75           | 27.79    | 1.00              | 5.12           | 8.14       | 2.10    | 5.38        |
| Northeast | 18-39     | 4.40   | 10.99           | 9.73     | 16.04             | 6.74           | 6.03       | 4.44    | 4.20        |
|           | 40-59     | 3.76   | 33.28           | 27.46    | 11.76             | 11.11          | 5.62       | 6.64    | 4.87        |
|           | 60-79     | 2.77   | 53.77           | 45.10    | 7.13              | 11.51          | 8.45       | 7.78    | 9.02        |
|           | >=80      | 2.67   | 54.25           | 35.88    | 3.88              | 7.03           | 16.07      | 5.08    | 9.36        |
